# Supplementary material for: Heterosupramolecular photocatalysis: oxidation of organic compounds in nanospaces between surfactant bilayers formed on TiO2Electronic supplementary information available: further characterization data and experimental details. See http://www.rsc.org/suppdata/cc/b2/b204593a/
Source: Royal Society of Chemistry journal article supplement (doi:10.1039/b204593a), 2002-07-08
Supplement: b204593a.doc [file b204593a.doc]

**Supplementary Information I** DRIFT spectra of the C18TAC/TiO2 particles recovered after irradiation in the absence (A) and presence (B) of 2-NAP. The particles were diluted with KBr at 2.0 wt%. The measurements were performed using a Perkin-Elmer 1760-X FT-IR spectrometer, and the spectra were recorded after the Kubelka-Munk transformation.

**Supplementary Information II** TiO2 particles (0.1 g) were added to a 0.6 mM C18TAC aqueous solution (10 mL), and the mixture was equilibrated at 25 C for 24 h. To this suspension, 10 mL of a 50 mM DMPO solution (solvent: H2O/acetonitrile = 99/1 v/v) was added to be equilibrated at 25 C for 24 h. After this air-saturated suspension had been irradiated for 90 min, an aliquot of it (5 mL) was filtered, and the filtrate was subjected to the ESR measurement. The ESR experiments were carried out at room temperature with a JEOL TE-200 spectrometer. The settings for the ESR spectrometer were microwave frequency = 9.18 GHz; modulation frequency = 100 kHz; modulation width = 0.32 mT; time constant = 0.03 s and power = 5.00 mW. This spectrum shows the ESR signals that are characteristic of the DMPO-OH adduct with a peak intensity of 1:2:2:1. Irradiation of the solution without TiO2 gave rise to no ESR signals.
